# Supplementary material
Source: HighWire-hosted journal article supplement (https://bmjopen.bmj.com/content/7/11/e018415)
Supplement: inline-supplementary-material-1 [file inline-supplementary-material-1.pdf]

Table 1 Summary of key measurements undertaken within the study

| Measurement                                                                                                                                | Instrument                                                                  | Number of measures                                                                               | Method of assessment                                                                                                                            |
|--------------------------------------------------------------------------------------------------------------------------------------------|-----------------------------------------------------------------------------|--------------------------------------------------------------------------------------------------|-------------------------------------------------------------------------------------------------------------------------------------------------|
| <b>Child anthropometric data</b>                                                                                                           |                                                                             |                                                                                                  |                                                                                                                                                 |
| <b>Weight</b>                                                                                                                              | An electronic scale (JH-1993T, weighting Apparatus Co. Ltd. Dalian)         | Once, at all time points                                                                         | Assessed by trained independent researcher: with child barefoot and in light clothing                                                           |
| <b>Birth weight</b>                                                                                                                        | Purposely developed question tested in the feasibility study                | Once, at all time points                                                                         | Parent questionnaire                                                                                                                            |
| <b>Body fat %</b>                                                                                                                          | Single-frequency ImpediMed machine (ImpDF50; Impedimed Pty Ltd, Australia). | Once, at all time points                                                                         | Assessed by trained independent researcher: with child barefoot and in light clothing, all metal accessories removed                            |
| <b>Blood pressure</b>                                                                                                                      | Automated monitors (Omron HEM-7211, Dalian)                                 | Twice (third measure if error reading, or if one value outside normal range), at all time points | Assessed by trained independent researcher: 3 minutes seated-rest before and between readings                                                   |
| <b>Height (to nearest 0.1 cm)</b>                                                                                                          | TGZ type height tester (Dalian)                                             | Twice (third measure if difference >0.4cm)                                                       | Assessed by trained independent researcher: with child barefoot and in light clothing; measured midway between the rib cage and the iliac crest |
| <b>Waist circumference (to nearest 0.1 cm)</b>                                                                                             | Flexible, non-stretch, cloth tape measure                                   |                                                                                                  |                                                                                                                                                 |
| <b>Other child-level data</b>                                                                                                              |                                                                             |                                                                                                  |                                                                                                                                                 |
| <b>Consumption frequency of common food and drinks</b> (weekly average servings of unhealthy snacks and sugar added drinks can be derived) | Adapted Leeds FFQ                                                           | Once, at all time points                                                                         | Parent questionnaire                                                                                                                            |
| <b>Daily average servings of fruit and vegetables</b>                                                                                      | Leeds FFQ                                                                   | Once, at all time points                                                                         | Parent questionnaire                                                                                                                            |
| <b>≥ 5 portions of fruit and veg daily, n (%)</b>                                                                                          | Leeds FFQ                                                                   | Once, at all time points                                                                         | Parent questionnaire                                                                                                                            |
| <b>Food/drinks intake (breakfast skipping, on the</b>                                                                                      | Translated version of the Day in Life                                       | Once (over 24 hours), at                                                                         | Child diary (completed inside                                                                                                                   |

|                                                                                                                                                                                             |                                                                                                                                                                   |                                                                              |                                                                                          |
|---------------------------------------------------------------------------------------------------------------------------------------------------------------------------------------------|-------------------------------------------------------------------------------------------------------------------------------------------------------------------|------------------------------------------------------------------------------|------------------------------------------------------------------------------------------|
| <b>way to school, during break time, after school but before dinner, before bedtime)</b>                                                                                                    | questionnaire                                                                                                                                                     | all time points                                                              | and outside school/at home)                                                              |
| <b>Objective measure of physical activity/sedentary behaviour</b> [MVPA time (minutes/24 hours) and sedentary time (hours/24hours) can be derived]                                          | Wrist worn accelerometer (GENEActiv Original, Activinsights Ltd, Cambridge)                                                                                       | Once (worn continuously for 5 days, including a weekend), at all time points | Fitted in school by trained independent researcher on the wrist of the non-dominant hand |
| <b>Subjective measure of physical activity</b>                                                                                                                                              | Adapting the Godin Leisure Time Exercise Questionnaire                                                                                                            | Once, at all time points                                                     | Parent questionnaire                                                                     |
| <b>Frequency and types of physical activities inside and outside school</b> (whether the child engaged in active sports/dancing/games for at least once in the last weekend can be derived) | PAQ-C                                                                                                                                                             | Once, at all time points                                                     | Child questionnaire (administered by trained independent researcher)                     |
| <b>Time spent in screen-based sedentary behaviour in weekdays and in the weekend</b>                                                                                                        | Purposely developed questions tested in the feasibility study                                                                                                     | Once, at all time points                                                     | Child questionnaire (administered by trained independent researcher)                     |
| <b>Commuting methods</b> (between home and school)                                                                                                                                          | Day in Life questionnaire                                                                                                                                         | Once (over 24 hours), at all time points                                     | Child diary (completed inside and outside school/at home)                                |
| <b>Quality of life (child)</b>                                                                                                                                                              | Paediatric Quality of Life Inventory (PedsQL) 8-12 years (validated Chinese version)                                                                              | Once, at all time points                                                     | Child questionnaire (administered by trained independent researcher)                     |
| <b>Social acceptance</b>                                                                                                                                                                    | Translated Kidscreen-52 health questionnaire for children and young people                                                                                        |                                                                              |                                                                                          |
| <b>Preference-based utility</b>                                                                                                                                                             | Chinese version of Child Health Utility 9D (CHU9D)                                                                                                                |                                                                              |                                                                                          |
| <b>Data on child's family and neighbourhood</b>                                                                                                                                             |                                                                                                                                                                   |                                                                              |                                                                                          |
| <b>Family and peer support for physical activity</b>                                                                                                                                        | Selected sections from the validated Chinese 'Psychosocial and environmental correlates measures of physical, activity and screen-based behaviours' questionnaire | Once, at all time points                                                     | Child questionnaire (administered by trained independent researcher)                     |
| <b>Parental enjoyment of screen-based behaviours</b>                                                                                                                                        |                                                                                                                                                                   |                                                                              |                                                                                          |
| <b>Social environment in the neighbourhood</b>                                                                                                                                              |                                                                                                                                                                   |                                                                              |                                                                                          |
| <b>Sports facilities in the neighbourhood</b>                                                                                                                                               |                                                                                                                                                                   |                                                                              |                                                                                          |

|                                                                                                                                                                 |                                                               |                          |                                                                     |
|-----------------------------------------------------------------------------------------------------------------------------------------------------------------|---------------------------------------------------------------|--------------------------|---------------------------------------------------------------------|
| <b>Perception of child body image</b>                                                                                                                           | Adapted Coleen's drawings of arrays (6-10 years)              | Once, at all time points | Parent questionnaire and Other adult household member questionnaire |
| <b>Current weight and height of parents or other adult household members</b>                                                                                    | Purposely developed questions tested in the feasibility study |                          |                                                                     |
| <b>Household monthly expenditure (by various categories)</b>                                                                                                    | Purposely developed questions tested in the feasibility study | Once, at all time points | Parent questionnaire                                                |
| <b>Household weekly expenditure in fruit and vegetables</b>                                                                                                     |                                                               |                          |                                                                     |
| <b>Household weekly expenditure in food overall</b>                                                                                                             |                                                               |                          |                                                                     |
| <b>Household weekly expenditure in microwave-cooked fast food and take away</b>                                                                                 |                                                               |                          |                                                                     |
| <b>Factors influencing household food purchase/choice decisions</b>                                                                                             |                                                               |                          |                                                                     |
| <b>Role of grandparent in child care</b>                                                                                                                        |                                                               |                          |                                                                     |
| <b>Quality of life (adults)</b>                                                                                                                                 | Chinese version of EQ-5D                                      | Once, at all time points | Parent questionnaire and Other household member questionnaire       |
| <b>Perceived changes in own dietary and physical activity behaviour over the intervention year</b>                                                              | Purposely developed questions tested in the feasibility study |                          |                                                                     |
| <b>Socio-demographic data</b>                                                                                                                                   |                                                               |                          |                                                                     |
| <b>Date of birth, sex, household composition and proxy measures for socio-economic position (household income, parental education level, employment status)</b> | Purposely developed questions tested in the feasibility study | once, at all time points | Parent questionnaire and school record on child birth date and sex  |
